# Supplementary material for: Acidic Urine pH and Clinical Outcome of Lower Urinary Tract Infection in Kidney Transplant Recipients Treated with Ciprofloxacin and Fosfomycin
Source: MDPI journal article supplement (doi:10.3390/antibiotics13020116), 2024-01-24
Supplement: s1 [file s1]

**Title: Acidic urine pH and clinical outcome of lower urinary tract infection in kidney transplant recipients treated with ciprofloxacin and fosfomycin**

**Supplementary data**

*Supplementary Tables S1 to S13*

**Supplementary Table S1.** Demographics and characteristics of the 115 kidney transplant recipients (KTR) with urinary tract infection (UTI) by *Escherichia coli*, and according the asymptomatic bacteriuria (AB) and cystitis episodes.

| Variables                                     | <i>E. coli</i><br>115 episodes | AB<br>96 episodes | Cystitis<br>19 episodes | <i>P</i> <sup>#</sup> |
|-----------------------------------------------|--------------------------------|-------------------|-------------------------|-----------------------|
| Age (years; median [IQR])                     | 58 (50-67)                     | 58 (50.3-66.8)    | 58 (49-68)              | 0.94                  |
| Age >60 years                                 | 47 (40.9)                      | 40 (41.2)         | 7 (36.8)                | 0.69                  |
| Female patients                               | 71 (61.7)                      | 57 (59.4)         | 14 (73.7)               | 0.24                  |
| Male patients                                 | 44 (38.3)                      | 39 (40.6)         | 5 (26.3)                | 0.24                  |
| Diabetes mellitus                             | 11 (9.6)                       | 9 (9.4)           | 2 (10.5)                | 1.00                  |
| Charlson Comorbidity Index (median [IQR])     | 3 (3-5)                        | 3 (3-5)           | 4 (3-5)                 | 0.43                  |
| Months from transplantation (median [IQR])    | 14 (4-77)                      | 15 (3.3-76.8)     | 11 (4-138)              | 0.90                  |
| < 2 months from transplantation               | 21 (18.3)                      | 18 (18.8)         | 3 (15.8)                | 1.00                  |
| < 3 months from transplantation               | 28 (24.3)                      | 24 (25.0)         | 4 (21.1)                | 1.00                  |
| < 6 months from transplantation               | 41 (35.7)                      | 34 (35.4)         | 7 (36.8)                | 0.91                  |
| < 12 months from transplantation              | 56 (48.7)                      | 45 (46.9)         | 11 (57.9)               | 0.38                  |
| Previous kidney transplantation               | 10 (8.7)                       | 9 (9.4)           | 1 (5.3)                 | 1.00                  |
| Living donor                                  | 11 (9.5)                       | 10 (10.5)         | 1 (5.3)                 | 0.69                  |
| Induction therapy within 3 previous months:   | 73 (63.5)                      | 62 (64.6)         | 11 (57.9)               | 0.58                  |
| - Thymoglobulin                               | 26 (22.6)                      | 21 (21.9)         | 5 (26.3)                | 0.76                  |
| - Basiliximab                                 | 41 (35.7)                      | 35 (36.5)         | 6 (31.6)                | 0.75                  |
| - Daclizumab                                  | 6 (5.2)                        | 6 (6.3)           | 0 (0.0)                 | 0.59                  |
| Current immunosuppression:                    |                                |                   |                         |                       |
| - Corticosteroids                             | 107 (93.0)                     | 89 (92.7)         | 18 (94.7)               | 1.00                  |
| - Tacrolimus                                  | 107 (93.0)                     | 89 (92.7)         | 18 (94.7)               | 1.00                  |
| - MMF                                         | 90 (78.3)                      | 77 (80.2)         | 13 (68.4)               | 0.36                  |
| - mTOR inhibitors                             | 8 (6.9)                        | 7 (7.3)           | 1 (5.3)                 | 1.00                  |
| - Cyclosporine                                | 4 (3.4)                        | 3 (3.1)           | 1 (5.3)                 | 0.52                  |
| Acute rejection within the previous 6 months  | 11 (9.6)                       | 8 (8.3)           | 3 (15.8)                | 0.39                  |
| Rejection treatment in the previous 6 months: |                                |                   |                         |                       |
| - Corticosteroid's bolus                      | 9 (7.9)                        | 6 (6.3)           | 3 (15.8)                | 1.00                  |
| - Plasmapheresis                              | 1 (0.9)                        | 0 (0.0)           | 1 (5.3)                 | 0.27                  |
| - Thymoglobulin                               | 1 (0.9)                        | 0 (0.0)           | 1 (5.3)                 | 0.27                  |
| Creatinine (mg/dL) - median (IQR)             | 1.57 (1.21-1.57)               | 1.54 (1.22-1.96)  | 1.63 (1.14-1.95)        | 0.92                  |
| Bacteriuria within the previous 6 months      | 57 (49.6)                      | 46 (47.9)         | 11 (57.9)               | 0.43                  |
| Antibiotic use within the previous 3 months   | 48 (41.7)                      | 39 (40.6)         | 9 (47.3)                | 0.59                  |
| - Quinolones*                                 | 11 (9.6)                       | 8 (8.3)           | 3 (15.8)                | 0.39                  |
| - Amoxicillin-clavulanate                     | 6 (5.2)                        | 5 (15.6)          | 1 (5.3)                 | 1.00                  |
| - Fosfomycin                                  | 14 (12.2)                      | 11 (11.5)         | 3 (15.8)                | 0.70                  |
| - Cephalosporins**                            | 15 (13.0)                      | 13 (13.5)         | 2 (10.5)                | 1.00                  |
| - Others***                                   | 6 (5.2)                        | 5 (5.2)           | 1 (5.3)                 | 0.42                  |
| Urinary pH - median (IQR)                     | 6 (6-6.5)                      | 6 (6-6.5)         | 6 (6-6.5)               | 0.46                  |
| Urine pH ≤6                                   | 60 (52.2)                      | 48 (50.0)         | 12 (63.2)               | 0.29                  |
| Antibiotic therapy of the UTI episodes        |                                |                   |                         |                       |
| - Fosfomycin                                  | 88 (76.5)                      | 75 (78.1)         | 13 (68.4)               | 0.38                  |
| - Ciprofloxacin                               | 27 (23.5)                      | 21 (21.9)         | 6 (31.6)                | 0.38                  |

IQR: Interquartile range; MMF: Mycophenolate mofetil; mTOR inhibitors: Sirolimus, everolimus; ESBL: Extended spectrum beta-lactamases. \*Quinolones: ciprofloxacin or levofloxacin; \*\*Cephalosporins: cefixime or cefuroxime; \*\*\*Others: Ertapenem and cloxacillin. #Comparison between AB and cystitis, through chi-square or Fisher exact tests.

**Supplementary Table S2.** Demographics and characteristics of the 115 kidney transplant recipients with urinary tract infection by *Escherichia coli* according the initial urine pH.

| Variables                                     | 115 episodes<br>N (%) | 60 episodes<br>Urine pH ≤6<br>N (%) | 55 episodes<br>Urine pH >6<br>N (%) | P <sup>#</sup> |
|-----------------------------------------------|-----------------------|-------------------------------------|-------------------------------------|----------------|
| Age (years; median [IQR])                     | 58 (50-67)            | 55.5 (47-61)                        | 64 (54-72)                          | <0.01          |
| Age >60 years                                 | 47 (40.9)             | 17 (28.3)                           | 30 (54.5)                           | <b>0.004</b>   |
| Female patients                               | 71 (61.7)             | 40 (66.7)                           | 31 (56.4)                           | 0.26           |
| Male patients                                 | 44 (38.3)             | 20 (33.3)                           | 24 (43.6)                           | 0.26           |
| Diabetes mellitus                             | 11 (9.6)              | 4 (6.7)                             | 7 (12.7)                            | 0.27           |
| Charlson Comorbidity Index (median [IQR])     | 3 (3-5)               | 3 (2-5)                             | 4 (3-5)                             | 0.05           |
| Months from transplantation (median [IQR])    | 14 (4-77)             | 17.5 (3.3-120)                      | 11 (4-46)                           | 0.47           |
| < 2 months from transplantation               | 21 (18.3)             | 13 (21.7)                           | 8 (14.5)                            | 0.32           |
| < 3 months from transplantation               | 28 (24.3)             | 15 (25.0)                           | 13 (23.6)                           | 0.87           |
| < 6 months from transplantation               | 41 (38.7)             | 20 (33.3)                           | 21 (38.2)                           | 0.59           |
| < 12 months from transplantation              | 56 (48.7)             | 26 (43.3)                           | 30 (54.5)                           | 0.23           |
| Previous kidney transplantation               | 10 (8.7)              | 6 (10.0)                            | 4 (7.3)                             | 0.75           |
| Living donor                                  | 11 (9.6)              | 7 (11.7)                            | 4 (7.3)                             | 0.53           |
| Induction therapy within 3 previous months:   | 73 (63.5)             | 35 (58.3)                           | 38 (69.1)                           | 0.96           |
| - Thymoglobulin                               | 26 (22.6)             | 14 (23.3)                           | 12 (21.8)                           | 1.00           |
| - Basiliximab                                 | 41 (35.7)             | 18 (30.0)                           | 23 (41.8)                           | 0.17           |
| - Daclizumab                                  | 6 (5.2)               | 3 (5.0)                             | 3 (5.5)                             | 1.00           |
| Current immunosuppression:                    |                       |                                     |                                     |                |
| - Corticosteroids                             | 107 (93.0)            | 55 (91.7)                           | 52 (94.5)                           | 0.72           |
| - Tacrolimus                                  | 107 (93.0)            | 56 (93.3)                           | 51 (92.7)                           | 1.00           |
| - MMF                                         | 90 (78.3)             | 49 (81.7)                           | 41 (74.5)                           | 0.36           |
| - mTOR inhibitors                             | 8 (7.0)               | 3 (5.0)                             | 5 (9.1)                             | 0.48           |
| - Cyclosporine                                | 4 (3.5)               | 3 (5.0)                             | 1 (1.8)                             | 0.62           |
| Acute rejection within the previous 6 months  | 11 (9.6)              | 4 (6.7)                             | 7 (12.7)                            | 0.27           |
| Rejection treatment in the previous 6 months: |                       |                                     |                                     |                |
| - Corticosteroid's bolus                      | 9 (7.8)               | 3 (5.0)                             | 6 (10.9)                            | 1.00           |
| - Plasmapheresis                              | 1 (0.9)               | 0 (0.0)                             | 1 (1.8)                             | 1.00           |
| - Thymoglobulin                               | 1 (0.9)               | 0 (0.0)                             | 1 (1.8)                             | 1.00           |
| Creatinine (mg/dL; median [IQR])              | 1.57 (1.21-1.95)      | 1.56 (1.17-2.15)                    | 1.58 (1.29-1.87)                    | 0.83           |
| Bacteriuria within the previous 6 months      | 57 (49.6)             | 25 (41.7)                           | 32 (58.2)                           | 0.08           |
| Cystitis                                      | 19 (16.5)             | 12 (20.0)                           | 7 (12.7)                            | 0.29           |
| Asymptomatic bacteriuria                      | 96 (83.5)             | 48 (80.0)                           | 48 (87.3)                           | 0.29           |
| Antibiotic therapy of the UTI episodes        |                       |                                     |                                     |                |
| - Fosfomycin                                  | 88 (76.5)             | 47 (78.3)                           | 41 (74.5)                           | 0.63           |
| - Ciprofloxacin                               | 27 (23.5)             | 13 (21.7)                           | 14 (25.5)                           | 0.63           |

IQR: Interquartile range; MMF: Mycophenolate mofetil; mTOR inhibitors: Sirolimus, everolimus; ESBL: Extended spectrum beta-lactamases; \*Quinolones: ciprofloxacin or levofloxacin; \*\*Cephalosporins: cefixime or cefuroxime; \*\*\*Others: Ertapenem, cloxacillin, cotrimoxazole and rifaximine. <sup>#</sup>Comparison between initial urine pH, through chi-square or Fisher exact tests.

**Supplementary Table S3.** Demographics and characteristics of the 115 kidney transplant recipients with urinary tract infection by *Escherichia coli* according symptomatic UTI during one-month follow-up.

| Variables                                     | 115 episodes<br>N (%) | Symptomatic UTI during<br>one-month follow-up |                     | P <sup>#</sup> |
|-----------------------------------------------|-----------------------|-----------------------------------------------|---------------------|----------------|
|                                               |                       | Yes (N=8)                                     | No (N=107)          |                |
| Age (years; median [IQR])                     | 58 (50-67)            | 59.5 (44-64)                                  | 58 (51-68)          | 0.70           |
| Age >60 years                                 | 47 (40.9)             | 4 (50.0)                                      | 43 (40.2)           | 0.71           |
| Female patients                               | 71 (61.7)             | 6 (75.0)                                      | 65 (60.7)           | 0.71           |
| Male patients                                 | 44 (38.3)             | 2 (25.0)                                      | 42 (39.3)           | 0.71           |
| Diabetes mellitus                             | 11 (9.6)              | 1 (12.5)                                      | 10 (9.3)            | 0.57           |
| Charlson Comorbidity Index (median [IQR])     | 3 (3-5)               | 4.5 (3.3-5.8)                                 | 3 (3-5)             | 0.12           |
| Months from transplantation (median [IQR])    | 14 (4-77)             | 24 (2.5-116)                                  | 13 (4-77)           | 1.00           |
| < 2 months from transplantation               | 21 (18.3)             | 2 (25.0)                                      | 19 (17.8)           | 0.64           |
| < 3 months from transplantation               | 28 (24.3)             | 2 (25.0)                                      | 26 (24.3)           | 1.00           |
| < 6 months from transplantation               | 41 (38.7)             | 2 (25.0)                                      | 39 (36.4)           | 0.71           |
| < 12 months from transplantation              | 56 (48.7)             | 3 (37.5)                                      | 53 (49.5)           | 0.72           |
| Previous kidney transplantation               | 10 (8.7)              | 1 (12.5)                                      | 9 (8.4)             | 0.53           |
| Living donor                                  | 11 (9.6)              | 1 (12.5)                                      | 10 (9.3)            | 0.57           |
| Induction therapy within 3 previous months:   | 73 (63.5)             | 4 (50.0)                                      | 69 (64.5)           | 0.72           |
| - Thymoglobulin                               | 26 (22.6)             | 1 (12.5)                                      | 25 (23.4)           | 0.68           |
| - Basiliximab                                 | 41 (35.7)             | 3 (37.5)                                      | 38 (35.5)           | 1.00           |
| - Daclizumab                                  | 6 (5.2)               | 0 (0.0)                                       | 6 (5.6)             | 1.00           |
| Current immunosuppression:                    |                       |                                               |                     |                |
| - Corticosteroids                             | 107 (93.0)            | 8 (100.0)                                     | 99 (92.5)           | 1.00           |
| - Tacrolimus                                  | 107 (93.0)            | 7 (87.5)                                      | 100 (93.5)          | 0.45           |
| - MMF                                         | 90 (78.3)             | 6 (75.0)                                      | 84 (78.5)           | 1.00           |
| - mTOR inhibitors                             | 8 (7.0)               | 0 (0.0)                                       | 8 (7.5)             | 1.00           |
| - Cyclosporine                                | 4 (3.5)               | 0 (0.0)                                       | 4 (3.7)             | 1.00           |
| Acute rejection within the previous 6 months  | 11 (9.6)              | 1 (12.5)                                      | 10 (9.3)            | 0.57           |
| Rejection treatment in the previous 6 months: |                       |                                               |                     |                |
| - Corticosteroid's bolus                      | 9 (7.8)               | 1 (12.5)                                      | 8 (7.5)             | 1.00           |
| - Plasmapheresis                              | 1 (0.9)               | 0 (0.0)                                       | 1 (0.9)             | 1.00           |
| - Thymoglobulin                               | 1 (0.9)               | 0 (0.0)                                       | 1 (0.9)             | 1.00           |
| Creatinine (mg/dL; median [IQR])              | 1.57<br>(1.21-1.95)   | 2.01<br>(1.38-2.55)                           | 1.54<br>(1.21-1.89) | 0.17           |
| Cystitis                                      | 19 (16.5)             | 4 (50.0)                                      | 15 (14.0)           | <b>0.025</b>   |
| Asymptomatic bacteriuria                      | 96 (83.5)             | 4 (50.0)                                      | 92 (86.0)           | <b>0.025</b>   |
| Urinary pH - median (IQR)                     | 6 (6-6.5)             | 6 (6-6)                                       | 6.5 (6-6.5)         | <b>0.017</b>   |
| Urine pH ≤6                                   | 60 (52.2)             | 8 (100.0)                                     | 52 (48.6)           | <b>0.006</b>   |
| Antibiotic therapy of the UTI episodes        |                       |                                               |                     |                |
| - Fosfomycin                                  | 88 (76.5)             | 7 (87.5)                                      | 81 (75.7)           | 0.68           |
| - Ciprofloxacin                               | 27 (23.5)             | 1 (12.5)                                      | 26 (24.3)           | 0.68           |

IQR: Interquartile range; MMF: Mycophenolate mofetil; mTOR inhibitors: Sirolimus, everolimus; ESBL: Extended spectrum beta-lactamases. <sup>#</sup>Comparison between symptomatic UTI, through chi-square or Fisher exact tests.

**Supplementary Table S4.** Demographics and characteristics of the 69 kidney transplant recipients (KTR) with urinary tract infection (UTI) by *Klebsiella pneumoniae*, and according the asymptomatic bacteriuria (AB) and cystitis episodes.

| Variables                                    | <i>K. pneumoniae</i><br>69 episodes | AB<br>36 episodes | Cystitis<br>33 episodes | P #   |
|----------------------------------------------|-------------------------------------|-------------------|-------------------------|-------|
| Age (years; median [IQR])                    | 61 (50-69)                          | 62.5 (53.3-70)    | 61 (47.5-68.5)          | 0.657 |
| Female patients                              | 42 (60.9)                           | 21 (58.3)         | 21 (63.6)               | 0.652 |
| Charlson Comorbidity Index – median (IQR)    | 5 (3-5)                             | 4.5 (3.3-5.8)     | 5 (3-5)                 | 0.508 |
| Months from transplantation (median [IQR])   | 6 (1-77)                            | 5 (1-50)          | 7 (3-99.5)              | 0.201 |
| < 2 months from transplantation              | 21 (30.4)                           | 14 (38.9)         | 7 (21.2)                | 0.200 |
| Previous kidney transplantation              | 8 (11.6)                            | 5 (13.9)          | 3 (9.1)                 | 0.712 |
| Living donor                                 | 6 (8.7)                             | 3 (8.3)           | 3 (9.1)                 | 1.000 |
| Induction therapy within 3 previous months:  | 28 (40.6)                           | 11 (30.6)         | 17 (51.4)               | 0.325 |
| - Thymoglobulin                              | 12 (17.4)                           | 4 (11.1)          | 8 (24.2)                | 0.151 |
| - Basiliximab                                | 14 (20.3)                           | 6 (16.7)          | 8 (24.2)                | 0.434 |
| - Daclizumab                                 | 2 (2.9)                             | 1 (2.8)           | 1 (3.0)                 | 1.000 |
| Current immunosuppression:                   |                                     |                   |                         |       |
| - Corticosteroids                            | 58 (84.1)                           | 29 (80.6)         | 29 (87.9)               | 0.406 |
| - Tacrolimus                                 | 64 (92.8)                           | 34 (94.4)         | 30 (90.9)               | 0.665 |
| - MMF                                        | 54 (78.3)                           | 30 (83.3)         | 24 (72.7)               | 0.286 |
| - mTOR inhibitors                            | 4 (5.8)                             | 3 (8.3)           | 1 (3.0)                 | 0.615 |
| - Cyclosporine                               | 3 (4.3)                             | 1 (2.8)           | 2 (6.1)                 | 0.603 |
| Acute rejection within the previous 6 months | 0 (0.0)                             | 0 (0.0)           | 0 (0.0)                 | ---   |
| Creatinine (mg/dL; median [IQR])             | 1.56 (1.25-1.99)                    | 1.49 (1.24-1.97)  | 1.69 (1.24-2.08)        | 0.459 |
| Bacteriuria within the previous 6 months     | 49 (71.0)                           | 24 (66.7)         | 25 (75.8)               | 0.406 |
| Antibiotic use within the previous 3 months  | 30 (43.5)                           | 14 (38.9)         | 16 (48.5)               | 0.425 |
| - Quinolones*                                | 3 (4.3)                             | 1 (2.8)           | 2 (6.1)                 | 0.603 |
| - Amoxicillin-clavulanate                    | 8 (11.6)                            | 5 (13.9)          | 3 (9.1)                 | 0.712 |
| - Fosfomycin                                 | 10 (14.5)                           | 5 (13.9)          | 5 (15.2)                | 1.000 |
| - Cephalosporins**                           | 7 (10.1)                            | 2 (5.6)           | 5 (15.2)                | 0.247 |
| - Others***                                  | 2 (2.9)                             | 1 (2.8)           | 1 (3.0)                 | 0.731 |
| Urinary pH (median [IQR])                    | 6.5 (6-6.5)                         | 6.5 (6-6.5)       | 6.5 (6-6.5)             | 0.979 |
| Baseline antibiotic resistance:              |                                     |                   |                         |       |
| - Cotrimoxazole                              | 42 (60.9)                           | 24 (66.7)         | 18 (54.5)               | 0.116 |
| - Ciprofloxacin                              | 20 (26.1)                           | 10 (27.8)         | 10 (30.3)               | 0.811 |
| - Amoxicillin-clavulanate                    | 15 (21.7)                           | 8 (22.2)          | 7 (21.2)                | 0.973 |
| - Fosfomycin                                 | 8 (8.7)                             | 4 (11.1)          | 4 (12.1)                | 1.000 |
| - Cephalosporins****                         | 21 (30.4)                           | 10 (27.8)         | 11 (33.3)               | 0.671 |
| - ESBL-production                            | 20 (29.0)                           | 9 (25.0)          | 11 (33.3)               | 0.446 |
| Antibiotic therapy of the UTI episodes       |                                     |                   |                         |       |
| - Fosfomycin                                 | 46 (66.7)                           | 25 (69.4)         | 21 (63.6)               | 0.609 |
| - Ciprofloxacin                              | 23 (33.3)                           | 11 (30.6)         | 12 (36.4)               | 0.609 |

IQR: Interquartile range; MMF: Mycophenolate mofetil; mTOR inhibitors: Sirolimus, everolimus; ESBL: Extended spectrum beta-lactamases; \*Quinolones: ciprofloxacin or levofloxacin; \*\*Cephalosporins: cefixime or cefuroxime; \*\*\*Others: Ertapenem and rifaximine; \*\*\*\*Cephalosporins: cefuroxime, cefotaxime, ceftazidime, cefixime or ceftazidime. #Comparison between AB and cystitis.

**Supplementary Table S5.** Demographics and characteristics of the 69 kidney transplant recipients with urinary tract infection by *Klebsiella pneumoniae* according the initial urine pH.

| Variables                                    | 69 episodes<br>N (%) | 29 episodes<br>Urine pH ≤6<br>N (%) | 40 episodes<br>Urine pH >6<br>N (%) | P <sup>#</sup> |
|----------------------------------------------|----------------------|-------------------------------------|-------------------------------------|----------------|
| Age (years; median [IQR])                    | 61 (50-69)           | 62 (55.5-69.9)                      | 59.5 (45.5-69.75)                   | 0.38           |
| Age >60 years                                | 36 (52.2)            | 16 (55.2)                           | 20 (50.0)                           | 0.67           |
| Female patients                              | 42 (60.9)            | 17 (58.6)                           | 25 (62.5)                           | 0.74           |
| Male patients                                | 27 (40.1)            | 12 (41.4)                           | 15 (37.5)                           | 0.74           |
| Diabetes mellitus                            | 29 (42.0)            | 13 (44.8)                           | 16 (40.0)                           | 0.69           |
| Charlson Comorbidity Index (median [IQR])    | 5 (3-5)              | 5 (4-5)                             | 4.5 (3-5.75)                        | 0.46           |
| Months from transplantation (median [IQR])   | 6 (1-77)             | 5 (0.5-44.5)                        | 7.5 (2.25-88.25)                    | 0.13           |
| < 2 months from transplantation              | 21 (30.4)            | 11 (37.9)                           | 10 (25.0)                           | 0.25           |
| < 3 months from transplantation              | 29 (42.0)            | 14 (48.3)                           | 15 (37.5)                           | 0.37           |
| < 6 months from transplantation              | 35 (50.7)            | 17 (58.6)                           | 18 (45.0)                           | 0.26           |
| < 12 months from transplantation             | 42 (60.9)            | 20 (69.0)                           | 22 (55.0)                           | 0.24           |
| Previous kidney transplantation              | 8 (11.6)             | 3 (10.3)                            | 5 (12.5)                            | 0.78           |
| Living donor                                 | 6 (8.7)              | 2 (6.9)                             | 4 (10.0)                            | 1.000          |
| Induction therapy within 3 previous months:  | 28 (40.6)            | 16 (55.2)                           | 12 (30.0)                           | 0.22           |
| - Thymoglobulin                              | 12 (17.4)            | 7 (24.1)                            | 5 (12.5)                            | 0.21           |
| - Basiliximab                                | 14 (20.3)            | 8 (27.6)                            | 6 (15.0)                            | 0.20           |
| - Daclizumab                                 | 2 (2.9)              | 1 (3.4)                             | 1 (2.5)                             | 1.000          |
| Current immunosuppression:                   |                      |                                     |                                     |                |
| - Corticosteroids                            | 58 (84.1)            | 27 (93.1)                           | 31 (77.5)                           | 0.10           |
| - Tacrolimus                                 | 64 (92.8)            | 28 (96.6)                           | 36 (90.0)                           | 0.39           |
| - MMF                                        | 54 (78.3)            | 23 (79.9)                           | 31 (77.5)                           | 0.86           |
| - mTOR inhibitors                            | 4 (5.8)              | 1 (3.4)                             | 3 (7.5)                             | 0.63           |
| - Cyclosporine                               | 3 (4.3)              | 1 (3.4)                             | 2 (5.0)                             | 1.000          |
| Acute rejection within the previous 6 months | 0 (0.0)              | 0 (0.0)                             | 0 (0.0)                             | Undefined      |
| Creatinine (mg/dL; median [IQR])             | 1.56 (1.25-1.99)     | 1.69 (1.35-2.09)                    | 1.50 (1.22-1.88)                    | 0.10           |
| Bacteriuria within the previous 6 months     | 49 (71.0)            | 3 (10.3)                            | 8 (20.0)                            | 0.39           |
| Cystitis                                     | 33 (47.8)            | 14 (48.3)                           | 19 (47.5)                           | 0.95           |
| Asymptomatic bacteriuria                     | 36 (52.2)            | 15 (51.7)                           | 21 (52.5)                           | 0.95           |
| Antibiotic therapy of the UTI episodes       |                      |                                     |                                     |                |
| - Fosfomycin                                 | 46 (66.7)            | 16 (55.2)                           | 30 (75.0)                           | 0.09           |
| - Ciprofloxacin                              | 23 (33.3)            | 13 (44.8)                           | 10 (25.0)                           | 0.09           |

IQR: Interquartile range; MMF: Mycophenolate mofetil; mTOR inhibitors: Sirolimus, everolimus; ESBL: Extended spectrum beta-lactamases; \*Quinolones: ciprofloxacin or levofloxacin; \*\*Cephalosporins: cefixime or cefuroxime; \*\*\*Others: Ertapenem and rifaximine; \*\*\*\*Cephalosporins: cefuroxime, cefotaxime, ceftazidime, cefixime or cefepime. <sup>#</sup>Comparison between initial urine pH, through chi-square or Fisher exact tests.

**Supplementary Table S6.** Demographics and characteristics of the 69 kidney transplant recipients with urinary tract infection by *Klebsiella pneumoniae* according symptomatic UTI during one-month follow-up.

| Variables                                    | 69 episodes<br>N (%) | Symptomatic UTI during one-month follow-up |                 | P <sup>#</sup> |
|----------------------------------------------|----------------------|--------------------------------------------|-----------------|----------------|
|                                              |                      | Yes (N=8)                                  | No (N=61)       |                |
| Age (years; median [IQR])                    | 61 (50-69)           | 52 (43.3-61.5)                             | 62 (53-70)      | 0.05           |
| Age >60 years                                | 36 (52.2)            | 2 (25.0)                                   | 34 (55.7)       | 0.14           |
| Female patients                              | 42 (60.9)            | 7 (87.5)                                   | 35 (57.4)       | 0.14           |
| Male patients                                | 27 (40.1)            | 1 (12.5)                                   | 26 (42.6)       | 0.14           |
| Diabetes mellitus                            | 29 (42.0)            | 5 (62.5)                                   | 24 (39.3)       | 0.27           |
| Charlson Comorbidity Index (median [IQR])    | 5 (3-5)              | 3.5 (2-4.8)                                | 5 (3-5.5)       | <b>0.045</b>   |
| Months from transplantation (median [IQR])   | 6 (1-77)             | 5 (1.25-134.8)                             | 6 (1-61)        | 0.81           |
| < 2 months from transplantation              | 21 (30.4)            | 3 (37.5)                                   | 18 (29.5)       | 0.69           |
| < 3 months from transplantation              | 29 (42.0)            | 4 (50.0)                                   | 25 (41.0)       | 0.71           |
| < 6 months from transplantation              | 35 (50.7)            | 4 (50.0)                                   | 31 (50.8)       | 1.00           |
| < 12 months from transplantation             | 42 (60.9)            | 5 (62.5)                                   | 37 (60.7)       | 1.00           |
| Previous kidney transplantation              | 8 (11.6)             | 1 (12.5)                                   | 7 (11.5)        | 1.00           |
| Living donor                                 | 6 (8.7)              | 1 (12.5)                                   | 5 (8.2)         | 0.54           |
| Induction therapy within 3 previous months:  | 28 (40.6)            | 3 (37.5)                                   | 25 (41.0)       | 0.24           |
| - Thymoglobulin                              | 12 (17.4)            | 3 (37.5)                                   | 9 (14.8)        | 0.14           |
| - Basiliximab                                | 14 (20.3)            | 0 (0.0)                                    | 14 (23.0)       | 0.19           |
| - Daclizumab                                 | 2 (2.9)              | 0 (0.0)                                    | 2 (3.3)         | 1.00           |
| Current immunosuppression:                   |                      |                                            |                 |                |
| - Corticosteroids                            | 58 (84.1)            | 7 (87.5)                                   | 51 (83.6)       | 1.00           |
| - Tacrolimus                                 | 64 (92.8)            | 7 (87.5)                                   | 57 (93.4)       | 0.47           |
| - MMF                                        | 54 (78.3)            | 5 (62.5)                                   | 49 (80.3)       | 0.36           |
| - mTOR inhibitors                            | 4 (5.8)              | 1 (12.5)                                   | 3 (4.9)         | 0.40           |
| - Cyclosporine                               | 3 (4.3)              | 0 (0.0)                                    | 3 (4.9)         | 1.00           |
| Acute rejection within the previous 6 months | 0 (0.0)              | 0 (0.0)                                    | 0 (0.0)         | Undefined      |
| Creatinine (mg/dL; median [IQR])             | 1.56 (1.25-1.99)     | 1.14 (0.81-1.69)                           | 1.6 (1.31-2.03) | 0.06           |
| Cystitis                                     | 33 (47.8)            | 6 (75.0)                                   | 27 (44.3)       | 0.14           |
| Asymptomatic bacteriuria                     | 36 (52.2)            | 2 (25.0)                                   | 34 (55.7)       | 0.14           |
| Urinary pH - median (IQR)                    | 6.5 (6-6.5)          | 6.25 (6-6.88)                              | 6.5 (6-6.5)     | 0.79           |
| Urine pH ≤6                                  | 29 (42.0)            | 4 (50.0)                                   | 25 (41.0)       | 0.71           |
| Antibiotic therapy of the UTI episodes       |                      |                                            |                 |                |
| - Fosfomycin                                 | 46 (66.7)            | 7 (87.5)                                   | 39 (63.9)       | 0.25           |
| - Ciprofloxacin                              | 23 (33.3)            | 1 (12.5)                                   | 22 (36.1)       | 0.25           |

IQR: Interquartile range; MMF: Mycophenolate mofetil; mTOR inhibitors: Sirolimus, everolimus; ESBL: Extended spectrum beta-lactamases; \*Quinolones: ciprofloxacin or levofloxacin; \*\*Cephalosporins: cefixime or cefuroxime; \*\*\*Others: Ertapenem and rifaximine; \*\*\*\*Cephalosporins: cefuroxime, cefotaxime, ceftazidime, cefixime or cefepime. <sup>#</sup>Comparison between symptomatic UTI, through chi-square or Fisher exact tests.

**Supplementary Table S7.** Symptomatic urinary tract infection (UTI) during one-month follow-up according the acidic urine pH, after fosfomycin or ciprofloxacin therapy of UTI by *Escherichia coli* or *Klebsiella pneumoniae* (N=184).

| Symptomatic UTI during one-month follow-up, N (%)      |                                            |              |               |       | P <sup>#</sup> |
|--------------------------------------------------------|--------------------------------------------|--------------|---------------|-------|----------------|
|                                                        |                                            | Yes          | No            |       |                |
| Total Cohort (N=184)                                   |                                            |              |               |       |                |
| Urine pH ≤6                                            | Total (N=89)                               | 12/16 (75.0) | 77/168 (45.8) | 0.027 |                |
|                                                        | Episodes treated with fosfomycin (N=63)    | 10/14 (71.4) | 53/120 (44.2) | 0.05  |                |
|                                                        | Episodes treated with ciprofloxacin (N=26) | 2/2 (100.0)  | 24/48 (50.0)  | 0.491 |                |
| Patients with age >60 years (N=81)                     |                                            |              |               |       |                |
| Urine pH ≤6                                            | Total (N=33)                               | 5/6 (83.3)   | 28/77 (36.4)  | 0.07  |                |
|                                                        | Episodes treated with fosfomycin (N=21)    | 3/4 (75.0)   | 18/51 (35.3)  | 0.15  |                |
|                                                        | Episodes treated with ciprofloxacin (N=12) | 2/2 (100.0)  | 10/26 (38.5)  | 0.41  |                |
| Patients with age ≤60 years (N=103)                    |                                            |              |               |       |                |
| Urine pH ≤6                                            | Total (N=56)                               | 7/10 (70.0)  | 49/91 (54.3)  | 0.34  |                |
|                                                        | Episodes treated with fosfomycin (N=42)    | 7/10 (70.0)  | 35/69 (50.7)  | 0.33  |                |
|                                                        | Episodes treated with ciprofloxacin (N=14) | 0/0 (0.0)    | 14/22 (63.6)  | -     |                |
| Patients with initial cystitis (N=52)                  |                                            |              |               |       |                |
| Urine pH ≤6                                            | Total (N=26)                               | 7/10 (70.0)  | 19/42 (54.3)  | 0.29  |                |
|                                                        | Episodes treated with fosfomycin (N=15)    | 5/8 (62.5)   | 10/26 (38.5)  | 0.42  |                |
|                                                        | Episodes treated with ciprofloxacin (N=11) | 2/2 (100.0)  | 9/16 (56.3)   | 0.50  |                |
| Patients with initial asymptomatic bacteriuria (N=132) |                                            |              |               |       |                |
| Urine pH ≤6                                            | Total (N=63)                               | 5/6 (83.3)   | 58/126 (46.0) | 0.10  |                |
|                                                        | Episodes treated with fosfomycin (N=48)    | 5/6 (83.3)   | 43/94 (45.7)  | 0.10  |                |
|                                                        | Episodes treated with ciprofloxacin (N=15) | 0/0 (0.0)    | 15/32 (46.9)  | -     |                |

<sup>#</sup> Chi-square or Fisher exact tests.



**Supplementary Table S8.** Symptomatic urinary tract infection (UTI) during one-month follow-up according the acidic urine pH, after fosfomycin or ciprofloxacin therapy of UTI by *Escherichia coli*.

| Symptomatic UTI during one-month follow-up, N (%)     |                                            |             |               |       | P <sup>#</sup> |
|-------------------------------------------------------|--------------------------------------------|-------------|---------------|-------|----------------|
|                                                       |                                            | Yes         | No            |       |                |
| Total Cohort (N=115)                                  |                                            |             |               |       |                |
| Urine pH ≤6                                           | Total (N=60)                               | 8/8 (100.0) | 52/107 (48.6) | 0.006 |                |
|                                                       | Episodes treated with fosfomycin (N=47)    | 7/7 (100.0) | 40/81 (49.4)  | 0.013 |                |
|                                                       | Episodes treated with ciprofloxacin (N=13) | 1/1 (100.0) | 12/26 (46.2)  | 0.481 |                |
| Patients with age >60 years (N=47)                    |                                            |             |               |       |                |
| Urine pH ≤6                                           | Total (N=17)                               | 4/4 (100.0) | 13/43 (30.2)  | 0.013 |                |
|                                                       | Episodes treated with fosfomycin (N=14)    | 3/3 (100.0) | 11/31 (35.5)  | 0.061 |                |
|                                                       | Episodes treated with ciprofloxacin (N=3)  | 1/1 (100.0) | 2/12 (16.7)   | 0.231 |                |
| Patients with age ≤60 years (N=68)                    |                                            |             |               |       |                |
| Urine pH ≤6                                           | Total (N=43)                               | 4/4 (100.0) | 39/64 (60.9)  | 0.289 |                |
|                                                       | Episodes treated with fosfomycin (N=33)    | 4/4 (100.0) | 29/50 (58.0)  | 0.148 |                |
|                                                       | Episodes treated with ciprofloxacin (N=10) | 0/0 (0.0)   | 10/14 (71.4)  | -     |                |
| Patients with initial cystitis (N=19)                 |                                            |             |               |       |                |
| Urine pH ≤6                                           | Total (N=12)                               | 4/4 (100.0) | 8/15 (53.3)   | 0.245 |                |
|                                                       | Episodes treated with fosfomycin (N=9)     | 3/3 (100.0) | 6/10 (60.0)   | 0.497 |                |
|                                                       | Episodes treated with ciprofloxacin (N=3)  | 1/1 (100.0) | 2/5 (40.0)    | 1.000 |                |
| Patients with initial asymptomatic bacteriuria (N=96) |                                            |             |               |       |                |
| Urine pH ≤6                                           | Total (N=48)                               | 4/4 (100.0) | 44/92 (47.8)  | 0.117 |                |
|                                                       | Episodes treated with fosfomycin (N=38)    | 4/4 (100.0) | 34/71 (47.9)  | 0.115 |                |
|                                                       | Episodes treated with ciprofloxacin (N=10) | 0/0 (0.0)   | 10/21 (47.6)  | -     |                |

<sup>#</sup> Chi-square or Fisher exact tests.

**Supplementary Table S9.** Symptomatic urinary tract infection (UTI) during one-month follow-up according the acidic urine pH, after fosfomycin or ciprofloxacin therapy of UTI by *Klebsiella pneumoniae* (N=69).

| Symptomatic UTI during one-month follow-up, N (%)     |                                            |             |              |      | P <sup>#</sup> |
|-------------------------------------------------------|--------------------------------------------|-------------|--------------|------|----------------|
|                                                       |                                            | Yes         | No           |      |                |
| Total Cohort (N=69)                                   |                                            |             |              |      |                |
| Urine pH ≤6                                           | Total (N=29)                               | 4/8 (50.0)  | 25/61 (41.0) | 0.71 |                |
|                                                       | Episodes treated with fosfomycin (N=16)    | 3/7 (42.9)  | 13/39 (33.3) | 0.68 |                |
|                                                       | Episodes treated with ciprofloxacin (N=13) | 1/1 (100.0) | 12/22 (54.5) | 1.00 |                |
| Patients with age >60 years (N=36)                    |                                            |             |              |      |                |
| Urine pH ≤6                                           | Total (N=16)                               | 1/2 (50.0)  | 15/34 (44.1) | 1.00 |                |
|                                                       | Episodes treated with fosfomycin (N=7)     | 0/1 (0.0)   | 7/20 (35.0)  | 1.00 |                |
|                                                       | Episodes treated with ciprofloxacin (N=9)  | 1/1 (0.0)   | 8/14 (57.1)  | 1.00 |                |
| Patients with age ≤60 years (N=33)                    |                                            |             |              |      |                |
| Urine pH ≤6                                           | Total (N=13)                               | 3/6 (50.0)  | 10/27 (37.3) | 0.66 |                |
|                                                       | Episodes treated with fosfomycin (N=9)     | 3/6 (50.0)  | 6/19 (31.6)  | 0.63 |                |
|                                                       | Episodes treated with ciprofloxacin (N=4)  | 0/0 (100.0) | 4/8 (50.0)   | -    |                |
| Patients with initial cystitis (N=33)                 |                                            |             |              |      |                |
| Urine pH ≤6                                           | Total (N=14)                               | 3/6 (50.0)  | 11/27 (40.1) | 1.00 |                |
|                                                       | Episodes treated with fosfomycin (N=6)     | 2/5 (40.0)  | 4/16 (25.0)  | 0.56 |                |
|                                                       | Episodes treated with ciprofloxacin (N=8)  | 1/1 (100.0) | 7/11 (63.6)  | 1.00 |                |
| Patients with initial asymptomatic bacteriuria (N=36) |                                            |             |              |      |                |
| Urine pH ≤6                                           | Total (N=15)                               | 1/2 (50.0)  | 14/34 (41.2) | 1.00 |                |
|                                                       | Episodes treated with fosfomycin (N=10)    | 1/2 (50.0)  | 9/23 (39.1)  | 1.00 |                |
|                                                       | Episodes treated with ciprofloxacin (N=5)  | 0/0 (0.0)   | 5/11 (45.5)  | -    |                |

<sup>#</sup> Chi-square or Fisher exact tests.

**Supplementary Table S10.** Microbiological and clinical outcomes, in patients with acidic (pH ≤6) *vs.* non-acidic (pH >6) urine, after fosfomycin or ciprofloxacin therapy of urinary tract infection (UTI) regardless of aetiology.

| Variable                                           |                                           | Urinary pH ≤6<br>N (%) | Urinary pH >6<br>N (%) | <i>p</i> <sup>#</sup> |
|----------------------------------------------------|-------------------------------------------|------------------------|------------------------|-----------------------|
| <b>UTI episodes (N=184)</b>                        |                                           |                        |                        |                       |
| Microbiological cure during<br>one-month follow-up | Total                                     | 47/89 (52.8)           | 53/95 (55.8)           | 0.706                 |
|                                                    | - Treated with fosfomycin                 | 33/63 (52.4)           | 35/71 (57.4)           | 0.848                 |
|                                                    | - Treated with ciprofloxacin              | 14/26 (53.9)           | 18/24 (75.0)           | 0.287                 |
|                                                    | Cystitis at basal episode                 | 9/26 (34.6)            | 15/26 (57.7)           | 0.263                 |
|                                                    | - Treated with fosfomycin                 | 4/15 (26.7)            | 9/19 (47.4)            | 0.339                 |
|                                                    | - Treated with ciprofloxacin              | 5/11 (45.5)            | 6/7 (85.7)             | 0.373                 |
|                                                    | Asymptomatic bacteriuria at basal episode | 38/63 (60.3)           | 38/69 (55.1)           | 0.839                 |
|                                                    | - Treated with fosfomycin                 | 29/48 (60.4)           | 26/52 (50.0)           | 0.529                 |
|                                                    | - Treated with ciprofloxacin              | 9/15 (60.0)            | 12/17 (70.6)           | 0.512                 |
|                                                    | <b>Total</b>                              | <b>12/89 (13.5)</b>    | <b>4/95 (4.2)</b>      | <b>0.052</b>          |
| Symptomatic UTI during one-<br>month follow-up     | - Treated with fosfomycin                 | 10/63 (15.9)           | 4/71 (5.6)             | 0.138                 |
|                                                    | - Treated with ciprofloxacin              | 2/26 (7.7)             | 0/24 (0.0)             | 0.387                 |
|                                                    | Cystitis at basal episode                 | 7/26 (26.9)            | 3/26 (11.5)            | 0.220                 |
|                                                    | - Treated with fosfomycin                 | 5/15 (33.3)            | 3/19 (15.8)            | 0.306                 |
|                                                    | - Treated with ciprofloxacin              | 2/11 (18.2)            | 0/7 (0.0)              | 0.527                 |
|                                                    | Asymptomatic bacteriuria at basal episode | 5/63 (7.9)             | 1/69 (1.5)             | 0.145                 |
|                                                    | - Treated with fosfomycin                 | 5/48 (10.4)            | 1/52 (1.9)             | 0.234                 |
|                                                    | - Treated with ciprofloxacin              | 0/15 (0.0)             | 0/17 (0.0)             | 0.600                 |
|                                                    | Total                                     | 14/89 (15.7)           | 15/95 (15.8)           | 0.825                 |
|                                                    | - Treated with fosfomycin                 | 11/63 (17.5)           | 13/71 (18.3)           | 0.921                 |
| Symptomatic UTI during<br>six-month follow-up      | - Treated with ciprofloxacin              | 3/26 (11.5)            | 2/24 (8.3)             | 0.299                 |
|                                                    | Cystitis at basal episode                 | 3/26 (11.5)            | 5/26 (19.2)            | 0.925                 |
|                                                    | - Treated with fosfomycin                 | 1/15 (6.6)             | 3/19 (15.8)            | 0.871                 |
|                                                    | - Treated with ciprofloxacin              | 2/11 (18.2)            | 2/7 (28.6)             | 0.730                 |
|                                                    | Asymptomatic bacteriuria at basal episode | 11/63 (17.5)           | 10/69 (14.5)           | 0.730                 |
|                                                    | - Treated with fosfomycin                 | 10/48 (20.8)           | 10/52 (19.2)           | 0.884                 |
|                                                    | - Treated with ciprofloxacin              | 1/15 (0.0)             | 0/17 (0.0)             | 0.600                 |

<sup>#</sup> Chi-square or Fisher tests

**Supplementary Table S11.** Initial clinical, urine pH, and microbiological characteristics of patients with symptomatic *Escherichia coli* and *Klebsiella pneumoniae* UTI episodes during one-month follow-up after fosfomycin or ciprofloxacin therapy.

| ID | Initial                 |          |            | Ciprofloxacin MIC |         | Fosfomycin MIC |         | Therapy | One-month follow-up                     |                      |            | Ciprofloxacin MIC |         | Fosfomycin MIC |         |
|----|-------------------------|----------|------------|-------------------|---------|----------------|---------|---------|-----------------------------------------|----------------------|------------|-------------------|---------|----------------|---------|
|    | Isolate                 | UTI      | Urine pH * | At pH 7           | At pH 5 | At pH 7        | At pH 5 |         | Isolate                                 | UTI                  | Urine pH * | At pH 7           | At pH 5 | At pH 7        | At pH 5 |
| 1  | <i>E. coli</i>          | Cystitis | 6          | <0.01             | 0.12    | 0.50           | 1       | FOS     | <i>E. coli</i>                          | Persistence/Cystitis | 6          | <0.01             | 0.06    | 1              | 0.50    |
| 2  | <i>E. coli</i>          | AB       | 6          | <0.01             | <0.01   | 0.50           | 2       | FOS     | <i>E. coli</i>                          | Recurrence/Cystitis  | 6.5        | -                 | -       | -              | -       |
| 3  | <i>E. coli</i>          | Cystitis | 6          | 8                 | >8      | 512            | 512     | FOS     | <i>E. coli</i>                          | Persistence/Cystitis | 6          | >8                | >8      | 1024           | 512     |
| 4  | <i>E. coli</i>          | AB       | 6          | 8                 | >8      | 1              | 0.50    | FOS     | <i>E. coli</i>                          | Recurrence/APN       | 6          | >8                | >8      | 128            | 64      |
| 5  | <i>E. coli</i>          | Cystitis | 6          | 0.25              | 2       | 1              | 1       | FOS     | <i>E. coli</i>                          | Persistence/Cystitis | 6          | 8                 | >8      | 1              | 0.50    |
| 6  | <i>E. coli</i>          | Cystitis | 6          | <0.01             | 0.12    | 0.25           | 1       | CIP     | <i>E. coli</i> **                       | Reinfection/Cystitis | 6          | -                 | -       | -              | -       |
| 7  | <i>E. coli</i>          | AB       | 6          | <0.01             | 0.12    | <0.12          | 0.50    | FOS     | <i>E. coli</i>                          | Persistence/Cystitis | 6.5        | -                 | -       | -              | -       |
| 8  | <i>E. coli</i> **       | AB       | 6          | <0.01             | 0.12    | <0.12          | 0.50    | FOS     | <i>E. coli</i>                          | Recurrence/Cystitis  | 6          | <0.01             | 0.12    | 2              | 1       |
| 1  | <i>K. pneumoniae</i>    | Cystitis | 6          | <0.01             | 0.25    | 128            | 64      | FOS     | <i>E. coli</i>                          | Reinfection/Cystitis | 6          | -                 | -       | -              | -       |
| 2  | <i>K. pneumoniae</i> ** | Cystitis | 6          | 0.12              | 2       | 32             | 64      | CIP     | <i>K. pneumoniae</i> **                 | Recurrence/Cystitis  | 5.5        | 0.12              | 8       | 32             | 32      |
| 3  | <i>K. pneumoniae</i>    | Cystitis | 6          | <0.01             | 0.50    | 8              | 32      | FOS     | <i>E. coli</i> and <i>K. pneumoniae</i> | Persistence/Cystitis | 6.5        | -                 | -       | -              | -       |
| 4  | <i>K. pneumoniae</i>    | AB       | 5.5        | <0.01             | 0.50    | 64             | 32      | FOS     | <i>K. pneumoniae</i>                    | Recurrence/Cystitis  | 5.5        | 0.25              | 0.25    | 32             | 64      |
| 5  | <i>K. pneumoniae</i>    | AB       | 6.5        | 0.25              | 4       | 32             | 32      | FOS     | <i>K. pneumoniae</i>                    | Persistence/APN      | 6.5        | 0.12              | 8       | 16             | 4       |
| 6  | <i>K. pneumoniae</i>    | Cystitis | 8          | <0.01             | 0.50    | 64             | 64      | FOS     | <i>E. coli</i>                          | Reinfection/Cystitis | 7          | -                 | -       | -              | -       |
| 7  | <i>K. pneumoniae</i> ** | Cystitis | 7          | >8                | >8      | 1024           | 256     | FOS     | ND                                      | Cystitis             | 7          | -                 | -       | -              | -       |
| 8  | <i>K. pneumoniae</i> ** | Cystitis | 6.5        | 1                 | >8      | 64             | 16      | FOS     | <i>K. pneumoniae</i> **                 | Recurrence/Cystitis  | 6          | 2                 | >8      | 8              | 32      |

ID: Patient identification; UTI: Urinary Tract Infection; \* Acidic pH ≤6, alkaline pH >7; MIC: Minimum Inhibitory Concentration; AB: Asymptomatic bacteriuria; APN: Acute pyelonephritis; FOS: Fosfomycin; CIP: Ciprofloxacin; \*\* Extended spectrum beta-lactamase production; Persistence: Same bacterial isolate with no negative results in urine cultures between basal one-month follow-up; Reinfection: Different bacterial isolate in urine cultures between basal one-month follow-up; Recurrence: Same bacterial isolate with negative results in urine cultures between basal one-month follow-up; -: Isolate not available to perform MIC assays; ND: not determined (colonization).

**Supplementary Table S12.** Ciprofloxacin and fosfomycin MIC distribution and frequencies of low-level quinolone and fosfomycin resistance rates in the 115 isolates of *Escherichia coli* and according the AB and cystitis episodes.

|                                    | <i>E. coli</i><br>115 episodes<br>N (%) | AB<br>96 episodes<br>N (%) | Cystitis<br>19 episodes<br>N (%) | <i>P</i> <sup>#</sup> |
|------------------------------------|-----------------------------------------|----------------------------|----------------------------------|-----------------------|
| <b>MIC Ciprofloxacin</b>           |                                         |                            |                                  |                       |
| - ≤0.01                            | 51 (44.3)                               | 42 (43.8)                  | 9 (47.4)                         | 0.807                 |
| - 0.01                             | 12 (10.4)                               | 8 (8.3)                    | 4 (21.1)                         | 0.077                 |
| - 0.03                             | 1 (0.9)                                 | 1 (1.0)                    | 0 (0.0)                          | 1.000                 |
| - 0.06                             | 9 (7.8)                                 | 8 (8.3)                    | 1 (5.3)                          | 0.352                 |
| - 0.12                             | 7 (6.1)                                 | 6 (6.3)                    | 1 (5.3)                          | 1.000                 |
| - 0.25                             | 2 (1.7)                                 | 1 (1.0)                    | 1 (5.3)                          | 0.275                 |
| - 0.50                             | 1 (0.9)                                 | 1 (1.0)                    | 0 (0.0)                          | 1.000                 |
| - 1                                | 1 (0.9)                                 | 0 (0.0)                    | 1 (5.3)                          | 0.148                 |
| - 2                                | 2 (1.7)                                 | 2 (2.1)                    | 0 (0.0)                          | 1.000                 |
| - 4                                | 9 (7.8)                                 | 8 (8.3)                    | 1 (5.3)                          | 1.000                 |
| - 8                                | 20 (17.4)                               | 19 (19.8)                  | 1 (5.3)                          | 0.299                 |
| <b>Resistance to ciprofloxacin</b> | 32 (27.8)                               | 29 (30.2)                  | 3 (15.8)                         | 0.391                 |
| <b>LLQR</b>                        | 10 (8.7)                                | 8 (8.3)                    | 2 (10.5)                         | 0.655                 |
| <b>MIC<sub>50</sub> (mg/L)</b>     | 0.01                                    | 0.03                       | <0.01                            | ---                   |
| <b>MIC<sub>90</sub> (mg/L)</b>     | 8                                       | >8                         | 2                                | ---                   |
| <b>MIC fosfomycin</b>              |                                         |                            |                                  |                       |
| - ≤0.12                            | 13 (11.3)                               | 11 (11.5)                  | 2 (10.5)                         | 1.000                 |
| - 0.25                             | 25 (21.7)                               | 22 (22.9)                  | 3 (15.8)                         | 1.000                 |
| - 0.50                             | 40 (34.8)                               | 34 (35.4)                  | 6 (31.6)                         | 0.614                 |
| - 1                                | 18 (15.7)                               | 15 (15.6)                  | 3 (15.8)                         | 0.729                 |
| - 2                                | 7 (6.1)                                 | 4 (4.2)                    | 3 (15.8)                         | 0.276                 |
| - 8                                | 3 (2.6)                                 | 3 (3.1)                    | 0 (0.0)                          | 1.000                 |
| - 16                               | 2 (1.7)                                 | 2 (2.1)                    | 0 (0.0)                          | 1.000                 |
| - 32                               | 2 (1.7)                                 | 1 (1.0)                    | 1 (5.3)                          | 0.275                 |
| - 128                              | 3 (2.6)                                 | 3 (3.1)                    | 0 (0.0)                          | 1.000                 |
| - 512                              | 2 (1.7)                                 | 1 (1.0)                    | 1 (5.3)                          | 0.275                 |
| <b>Resistance to fosfomycin</b>    | 9 (7.8)                                 | 7 (7.3)                    | 2 (10.5)                         | 0.620                 |
| <b>LLFR</b>                        | 3 (2.6)                                 | 3 (3.1)                    | 0 (0.0)                          | 1.000                 |
| <b>MIC<sub>50</sub> (mg/L)</b>     | 0.50                                    | 0.50                       | 0.50                             | ---                   |
| <b>MIC<sub>90</sub> (mg/L)</b>     | 8                                       | 2                          | 2                                | ---                   |

AB: Asymptomatic Bacteriuria; MIC: Minimum Inhibitory Concentration; Resistance to ciprofloxacin: MIC > 0.5 mg/L; LLQR: Low-Level Quinolone Resistance (0.06<MIC≤0.50); MIC<sub>50</sub>: MIC of 50% of isolates; MIC<sub>90</sub>: MIC of 90% of isolates; Resistance to fosfomycin: MIC>8 mg/L; LLFR: Low-Level Fosfomycin Resistance (4<MIC≤8); <sup>#</sup>Comparison between AB and cystitis.

**Supplementary Table S13.** Ciprofloxacin and fosfomycin MIC distribution and frequencies of low-level quinolone and fosfomycin resistance rates in the 69 isolates of *Klebsiella pneumoniae* and according the AB and cystitis episodes.

|                                    | <i>K. pneumoniae</i><br>69 episodes<br>N (%) | AB<br>36 episodes<br>N (%) | Cystitis<br>33 episodes<br>N (%) | <i>P</i> # |
|------------------------------------|----------------------------------------------|----------------------------|----------------------------------|------------|
| <b>MIC Ciprofloxacin</b>           |                                              |                            |                                  |            |
| - ≤0.01                            | 24 (34.8)                                    | 10 (27.8)                  | 14 (42.4)                        | 0.356      |
| - 0.01                             | 1 (1.5)                                      | 0 (0.0)                    | 1 (3.1)                          | 1.000      |
| - 0.06                             | 3 (4.3)                                      | 1 (2.7)                    | 2 (6.0)                          | 1.000      |
| - 0.12                             | 5 (7.2)                                      | 4 (11.1)                   | 1 (3.1)                          | 0.198      |
| - 0.25                             | 8 (11.6)                                     | 4 (11.1)                   | 4 (12.1)                         | 1.000      |
| - 0.50                             | 5 (7.2)                                      | 4 (11.1)                   | 1 (3.1)                          | 0.198      |
| - 1                                | 9 (13.0)                                     | 6 (16.7)                   | 3 (9.1)                          | 0.481      |
| - 2                                | 4 (5.8)                                      | 2 (5.6)                    | 2 (6.0)                          | 0.614      |
| - 4                                | 4 (5.8)                                      | 2 (5.6)                    | 2 (6.0)                          | 1.000      |
| - 8                                | 1 (1.5)                                      | 1 (2.7)                    | 0.0 (0)                          | 0.493      |
| - >8                               | 5 (7.2)                                      | 2 (5.6)                    | 3 (9.1)                          | 1.000      |
| <b>Resistance to ciprofloxacin</b> | 23 (33.3)                                    | 13 (36.1)                  | 10 (30.3)                        | 0.865      |
| <b>LLQR</b>                        | 13 (18.8)                                    | 8 (22.2)                   | 5 (15.2)                         | 0.326      |
| <b>MIC<sub>50</sub> (mg/L)</b>     | 0.25                                         | 0.25                       | 0.06                             | ---        |
| <b>MIC<sub>90</sub> (mg/L)</b>     | 4                                            | 4                          | 4                                | ---        |
| <b>MIC fosfomycin</b>              |                                              |                            |                                  |            |
| - 4                                | 3 (4.3)                                      | 2 (5.6)                    | 1 (3.1)                          | 0.614      |
| - 8                                | 11 (16.0)                                    | 3 (8.3)                    | 8 (24.2)                         | 0.111      |
| - 16                               | 15 (21.7)                                    | 7 (19.4)                   | 8 (24.2)                         | 0.163      |
| - 32                               | 20 (29.0)                                    | 13 (36.1)                  | 7 (21.2)                         | 0.095      |
| - 64                               | 9 (13.0)                                     | 5 (13.9)                   | 4 (12.1)                         | 0.734      |
| - 128                              | 2 (2.9)                                      | 1 (2.7)                    | 1 (3.1)                          | 1.000      |
| - 256                              | 2 (2.9)                                      | 2 (5.6)                    | 0.0 (0)                          | 0.239      |
| - 512                              | 1 (1.5)                                      | 1 (2.7)                    | 0.0 (0)                          | 0.493      |
| - 1024                             | 1 (1.5)                                      | 0 (0.0)                    | 1 (3.1)                          | 1.000      |
| - >1024                            | 5 (7.2)                                      | 2 (5.6)                    | 3 (9.1)                          | 1.000      |
| <b>Resistance to fosfomycin</b>    | 55 (79.7)                                    | 31 (86.1)                  | 24 (72.6)                        | 1.000      |
| <b>LLFR</b>                        | NA                                           | NA                         | NA                               | ---        |
| <b>MIC<sub>50</sub> (mg/L)</b>     | 32                                           | 32                         | 16                               | ---        |
| <b>MIC<sub>90</sub> (mg/L)</b>     | 512                                          | 256                        | 128                              | ---        |

AB: Asymptomatic Bacteriuria; MIC: Minimum Inhibitory Concentration; Resistance to ciprofloxacin: MIC>0.5 mg/L; LLQR: Low-Level Quinolone Resistance (0.12<MIC≤0.50); MIC<sub>50</sub>: MIC of 50% of isolates; MIC<sub>90</sub>: MIC of 90% of isolates; Resistance to fosfomycin: MIC>8 mg/L; NA: Not applicable; #Comparison between AB and cystitis.

**Supplementary Table S14.** *In vitro* MIC distribution of ciprofloxacin at pH 5.0 (acidic) and 8.0 (alkaline) of *E. coli* and *K. pneumoniae* clinical isolates with low-level ciprofloxacin resistance at pH 7.0 (neutral).

| Microorganism                | Isolates (n) | pH of test | No. of isolates with the following MIC (mg/L): |      |      |      |      |      |     |   |   |   |   |    | MIC (mg/L) |      |
|------------------------------|--------------|------------|------------------------------------------------|------|------|------|------|------|-----|---|---|---|---|----|------------|------|
|                              |              |            | <0.01                                          | 0.01 | 0.03 | 0.06 | 0.12 | 0.25 | 0.5 | 1 | 2 | 4 | 8 | >8 | 50%        | 90%  |
| <i>Escherichia coli</i>      | 10           | 5          | -                                              | -    | -    | -    | -    | -    | 2   | - | 5 | - | 1 | 2  | 2          | ≥8   |
|                              |              | 7          | -                                              | -    | -    | -    | 7    | 2    | 1   | - | - | - | - | -  | 0.12       | 0.25 |
|                              |              | 8          | -                                              | -    | -    | 2    | 3    | 1    | 3   | 1 | - | - | - | -  | 0.12       | 0.5  |
| <i>Klebsiella pneumoniae</i> | 13           | 5          | -                                              | -    | -    | -    | -    | 4    | -   | - | 4 | 4 | 1 | -  | 2          | 4    |
|                              |              | 7          | -                                              | -    | -    | -    | -    | 8    | 5   | - | - | - | - | -  | 0.25       | 0.5  |
|                              |              | 8          | 3                                              | -    | 1    | -    | 3    | 5    | 1   | - | - | - | - | -  | 0.12       | 0.25 |

-: no isolate; S: susceptible; LLQR: Low-level quinolone resistance; R: resistant; EUCAST. European Committee on Antimicrobial Susceptibility Testing interpretative criteria (resistant. MIC > 0.5 g/L).

**Supplementary Table S15.** *In vitro* MIC distribution of fosfomycin at pH 5.0 (acidic) and 8.0 (alkaline) of *E. coli* clinical isolates with low-level fosfomycin resistance at pH 7.0 (neutral).

| Microorganism           | Isolates (n) | pH of test | No. of isolates with the following MIC (mg/L): |   |    |    |    |     | MIC (mg/L) |     |
|-------------------------|--------------|------------|------------------------------------------------|---|----|----|----|-----|------------|-----|
|                         |              |            | 4                                              | 8 | 16 | 32 | 64 | 128 | 50%        | 90% |
| <i>Escherichia coli</i> | 3            | 5          | 1                                              | 1 | -  | 1  | -  | -   | 8          | 32  |
|                         |              | 7          | -                                              | 3 | -  | -  | -  | -   | 8          | 8   |
|                         |              | 8          | -                                              | 1 | -  | 1  | -  | 1   | 32         | 128 |

-: no isolate; S: susceptible; LLFR: Low-level fosfomycin resistance; R: resistant; EUCAST. European Committee on Antimicrobial Susceptibility Testing interpretative criteria (resistant. MIC > 8 g/L).

**Supplementary Table S16.** pH effect on the bactericidal activity of ciprofloxacin MIC, in MHB and urine, against uropathogenic *Escherichia coli* strains.

| pH       | Time (h) | <i>E. coli</i> Nu14 |       | <i>E. coli</i> HUVR 94 |       | <i>E. coli</i> Nu79 <i>gyrA</i> D87G |       | <i>E. coli</i> Nu14 <i>glpT</i> missense mutation |       |
|----------|----------|---------------------|-------|------------------------|-------|--------------------------------------|-------|---------------------------------------------------|-------|
|          |          | MHB                 | Urine | MHB                    | Urine | MHB                                  | Urine | MHB                                               | Urine |
| Neutral  | 2        | -2.40               | -2.71 | -1.46                  | -1.20 | -1.24                                | -1.69 | -1.25                                             | -1.65 |
|          | 4        | -2.65               | -2.98 | -2.68                  | -1.79 | -2.28                                | -2.03 | -1.50                                             | -2.12 |
|          | 6        | -2.87               | -3.30 | -3.11                  | -2.30 | -2.97                                | -2.79 | -1.84                                             | -2.25 |
|          | 24       | -5.73               | -5.70 | -5.15                  | -4.91 | -5.38                                | -4.34 | -1.08                                             | -4.37 |
| Acidic   | 2        | 0.33                | 0.18  | -0.21                  | -0.84 | -0.83                                | -0.40 | 0.16                                              | -0.32 |
|          | 4        | 0.96                | 1.42  | -0.34                  | -1.42 | -0.41                                | 0.39  | 1.13                                              | 0.64  |
|          | 6        | 2.20                | 2.09  | 2.21                   | 2.06  | 2.19                                 | 0.33  | 1.31                                              | 1.91  |
|          | 24       | 2.70                | 2.39  | 1.86                   | -4.79 | 3.84                                 | 1.59  | 3.57                                              | 1.86  |
| Alkaline | 2        | -2.49               | -2.20 | -2.23                  | -1.57 | -1.53                                | -1.51 | -2.05                                             | -1.58 |
|          | 4        | -2.39               | -2.65 | -2.85                  | -1.92 | -2.54                                | -2.60 | -2.27                                             | -1.85 |
|          | 6        | -2.86               | -2.65 | -3.31                  | -2.27 | -2.95                                | -2.24 | -2.66                                             | -2.31 |
|          | 24       | -4.44               | -5.72 | -5.17                  | -4.09 | -5.41                                | -5.20 | -4.68                                             | -4.71 |

Results are represented as differences ( $\log_{10}$  CFU/mL) relative to the initial time point (0 h). Green indicates a  $>3 \log_{10}$  CFU/mL decrease, orange a 3 to 0  $\log_{10}$  CFU/mL decrease, and white no bacterial reduction. Ciprofloxacin MIC concentrations (mg/L): 0.03, 0.03, 0.12 and 0.01 for *E. coli* Nu14, *E. coli* HUVR 94, *E. coli* Nu79 *gyrA* D87G, and *E. coli* Nu14 *glpT* missense mutation, respectively.



**Supplementary Table S17.** pH effect on the bactericidal activity of fosfomycin MIC; in MHB and urine, against uropathogenic *Escherichia coli* strains.

| pH       | Time (h) | <i>E. coli</i> Nu14 |       | <i>E. coli</i> HUVR 94 |       | <i>E. coli</i> Nu79 <i>gyrA</i> D87G |       | <i>E. coli</i> Nu14 <i>glpT</i> missense mutation |       |
|----------|----------|---------------------|-------|------------------------|-------|--------------------------------------|-------|---------------------------------------------------|-------|
|          |          | MHB                 | Urine | MHB                    | Urine | MHB                                  | Urine | MHB                                               | Urine |
| Neutral  | 2        | -3.34               | -2.72 | -1.27                  | -0.07 | -2.48                                | -0.82 | -2.24                                             | -0.81 |
|          | 4        | -3.32               | -3.31 | -2.33                  | 0.01  | -3.75                                | -2.71 | -2.81                                             | -2.46 |
|          | 6        | -3.88               | -2.34 | 2.94                   | 0.00  | -3.84                                | -1.41 | -3.09                                             | -2.41 |
|          | 24       | 2.09                | 0.85  | 1.87                   | 2.69  | 1.26                                 | 2.42  | 3.33                                              | 1.93  |
| Acidic   | 2        | -0.70               | -0.19 | -1.22                  | -1.21 | -1.44                                | -0.34 | -1.84                                             | -2.31 |
|          | 4        | -2.79               | -1.55 | -2.12                  | -1.58 | -1.16                                | 0.58  | -2.79                                             | -2.78 |
|          | 6        | -2.27               | -1.23 | -1.54                  | -2.12 | -1.66                                | 0.16  | -3.56                                             | -2.61 |
|          | 24       | 2.52                | 1.43  | 1.97                   | 2.14  | 1.42                                 | 3.06  | 2.77                                              | 1.13  |
| Alkaline | 2        | -2.64               | -1.28 | -1.43                  | -0.32 | -1.86                                | -0.43 | -2.31                                             | -1.34 |
|          | 4        | -3.02               | -0.91 | -2.17                  | 0.72  | -3.96                                | 0.45  | -3.21                                             | -1.58 |
|          | 6        | -2.50               | -0.27 | 2.88                   | 1.98  | -3.99                                | 0.96  | -3.45                                             | -1.82 |
|          | 24       | 1.54                | 0.97  | 1.80                   | 2.51  | -0.10                                | 2.04  | 3.18                                              | 1.61  |

Results are represented as differences ( $\log_{10}$  CFU/mL) relative to the initial time point (0 h). Green indicates a  $>3 \log_{10}$  CFU/mL decrease, orange a 3 to 0  $\log_{10}$  CFU/mL. Fosfomycin MIC concentrations (mg/L): 2, 0.50, 0.50 and 32 for *E. coli* Nu14, *E. coli* HUVR 94, *E. coli* Nu79 *gyrA* D87G, and *E. coli* Nu14 *glpT* missense mutation, respectively.

**Supplementary Table S18.** pH effect on the bactericidal activity of ciprofloxacin MIC, in MHB and urine, against uropathogenic *Klebsiella pneumoniae* strains.

| pH       | Time (h) | <i>K. pneumoniae</i> HUVR42 |       | <i>K. pneumoniae</i> HUVR5 |       | <i>K. pneumoniae</i> HUVR110 |       | <i>K. pneumoniae</i> HUVR91 |       |
|----------|----------|-----------------------------|-------|----------------------------|-------|------------------------------|-------|-----------------------------|-------|
|          |          | MHB                         | Urine | MHB                        | Urine | MHB                          | Urine | MHB                         | Urine |
| Neutral  | 2        | -0.19                       | -0.29 | -3.07                      | -1.49 | -1.65                        | -1.51 | -0.08                       | -0.38 |
|          | 4        | -0.18                       | 0.19  | -3.87                      | -2.09 | -2.08                        | -2.38 | 0.01                        | 0.41  |
|          | 6        | 0.45                        | 1.65  | -4.08                      | -2.70 | -2.81                        | -3.07 | 2.15                        | -1.83 |
|          | 24       | 3.54                        | 3.63  | -5.47                      | -4.21 | -3.93                        | -5.40 | 3.63                        | 3.06  |
| Acidic   | 2        | -0.40                       | -0.17 | -4.95                      | -4.21 | -1.72                        | -1.64 | 0.53                        | -0.01 |
|          | 4        | 0.87                        | 0.40  | -4.45                      | -4.15 | -2.84                        | -2.60 | 2.55                        | -0.37 |
|          | 6        | 0.28                        | 2.18  | -5.45                      | -5.45 | -3.33                        | -3.30 | 3.40                        | 1.62  |
|          | 24       | 4.22                        | 3.33  | -4.95                      | -5.45 | -4.87                        | -4.88 | 4.04                        | 2.88  |
| Alkaline | 2        | -0.14                       | -0.17 | -1.21                      | -1.38 | -1.58                        | -1.34 | -0.82                       | -0.18 |
|          | 4        | -0.82                       | -0.03 | -1.87                      | -1.97 | -2.10                        | -2.16 | -1.64                       | -0.91 |
|          | 6        | -1.05                       | 1.54  | -2.57                      | -2.71 | -2.74                        | -2.95 | -2.12                       | -1.10 |
|          | 24       | 4.18                        | 2.45  | -4.77                      | -4.63 | -4.13                        | -3.70 | 4.02                        | 2.61  |

Results are represented as differences (log<sub>10</sub> CFU/mL) relative to the initial time point (0 h). Green indicates a >3 log<sub>10</sub> CFU/mL decrease, red a 3 to 0 log<sub>10</sub> CFU/mL decrease, and white no bacterial reduction. Ciprofloxacin MIC concentrations (mg/L): 0.007, 8, 8 and 0.006 for *K. pneumoniae* HUVR42, *K. pneumoniae* HUVR5, *K. pneumoniae* HUVR110, and *K. pneumoniae* HUVR91, respectively.

**Supplementary Table S19.** pH effect on the bactericidal activity of fosfomycin MIC; in MHB and urine, against uropathogenic *Klebsiella pneumoniae* strains.

| pH       | Time (h) | <i>K. pneumoniae</i> HUVR42 |       | <i>K. pneumoniae</i> HUVR5 |       | <i>K. pneumoniae</i> HUVR110 |       | <i>K. pneumoniae</i> HUVR91 |       |
|----------|----------|-----------------------------|-------|----------------------------|-------|------------------------------|-------|-----------------------------|-------|
|          |          | MHB                         | Urine | MHB                        | Urine | MHB                          | Urine | MHB                         | Urine |
| Neutral  | 2        | -0.72                       | -0.19 | -2.49                      | -0.99 | -1.58                        | -1.05 | -0.86                       | -2.35 |
|          | 4        | -0.99                       | -0.90 | 2.80                       | -2.14 | -1.57                        | -2.05 | -2.53                       | -2.74 |
|          | 6        | -1.84                       | -1.06 | -1.29                      | -1.55 | -2.11                        | -2.43 | -1.67                       | -2.08 |
|          | 24       | 3.82                        | 3.14  | 3.61                       | 2.72  | -3.66                        | -4.76 | 3.69                        | 3.34  |
| Acidic   | 2        | -0.72                       | -0.37 | -2.40                      | -2.41 | -0.42                        | -0.40 | -2.76                       | -3.51 |
|          | 4        | -0.82                       | -1.06 | -2.67                      | -2.79 | -1.37                        | -1.60 | -2.80                       | -2.77 |
|          | 6        | -1.17                       | -1.13 | -3.21                      | -2.80 | -1.82                        | -2.44 | -3.17                       | -2.89 |
|          | 24       | 1.55                        | 2.53  | -3.32                      | -3.30 | 2.16                         | -4.33 | 3.94                        | 3.31  |
| Alkaline | 2        | -0.59                       | -0.27 | -2.41                      | -1.76 | -0.10                        | -0.47 | -0.11                       | -1.04 |
|          | 4        | -1.14                       | -0.61 | -2.79                      | -2.51 | -1.56                        | -1.09 | -1.84                       | -1.79 |
|          | 6        | -1.23                       | -1.01 | -2.80                      | -0.47 | -1.63                        | -2.69 | 0.57                        | -0.62 |
|          | 24       | 3.69                        | 1.93  | -3.30                      | 2.93  | 2.20                         | 2.52  | 3.81                        | 3.92  |

Results are represented as differences ( $\log_{10}$  CFU/mL) relative to the initial time point (0 h). Green indicates a  $>3 \log_{10}$  CFU/mL decrease, orange a 3 to 0  $\log_{10}$  CFU/mL. Fosfomycin MIC concentrations (mg/L): 4, 128, 4, and 64 for *K. pneumoniae* HUVR42, *K. pneumoniae* HUVR5, *K. pneumoniae* HUVR110, and *K. pneumoniae* HUVR91, respectively.
